# Supplementary material for: C-Phycocyanin as a potential biosensor for heavy metals like Hg2+ in aquatic systems
Source: Royal Society of Chemistry journal article supplement (doi:10.1039/c6ra22753h), 2016-01-01

Supplementary figures:

Fig.S1: Fluorescence intensity graph

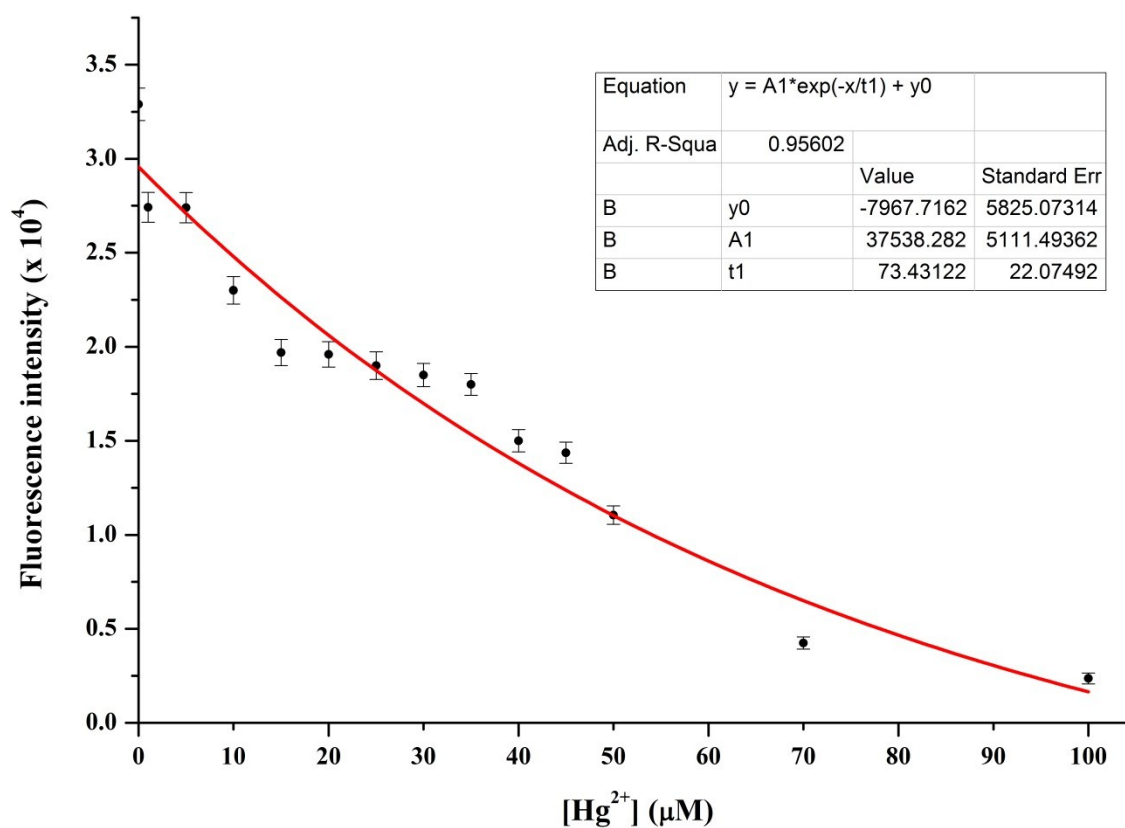

**Fig.S2:** Stern–Volmer constant ( $K_{sv}$ ) calculation for C-PC- $\text{Hg}^{2+}$  interaction.

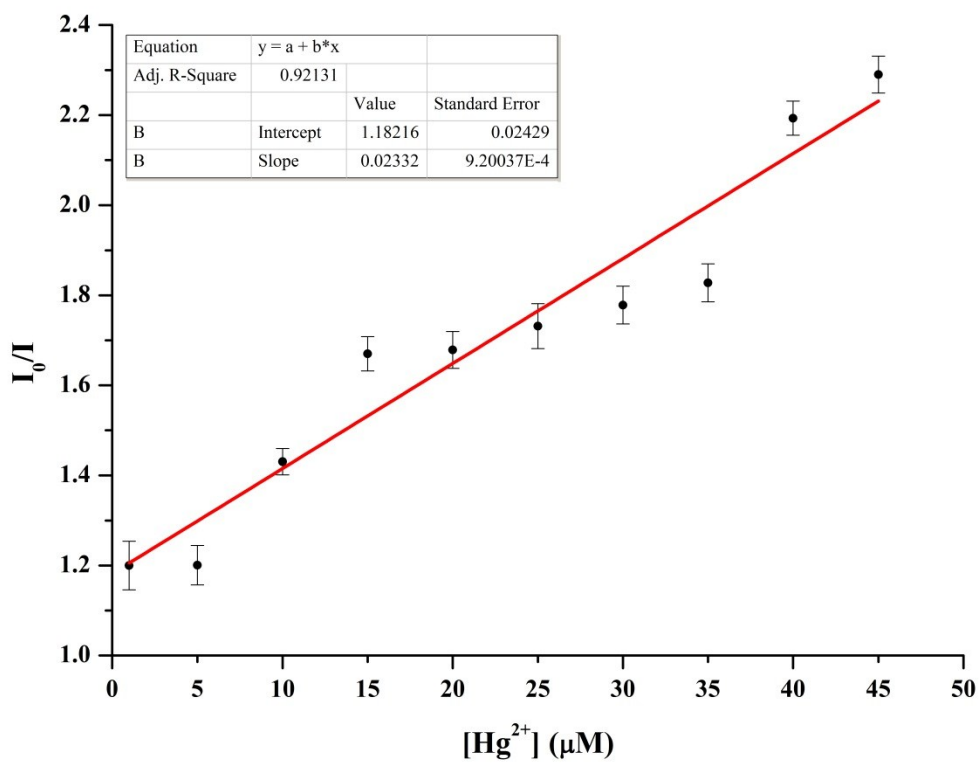

**Fig.S3:**backscatter electron image of C-PC- Hg<sup>2+</sup> (SEM-EDX)

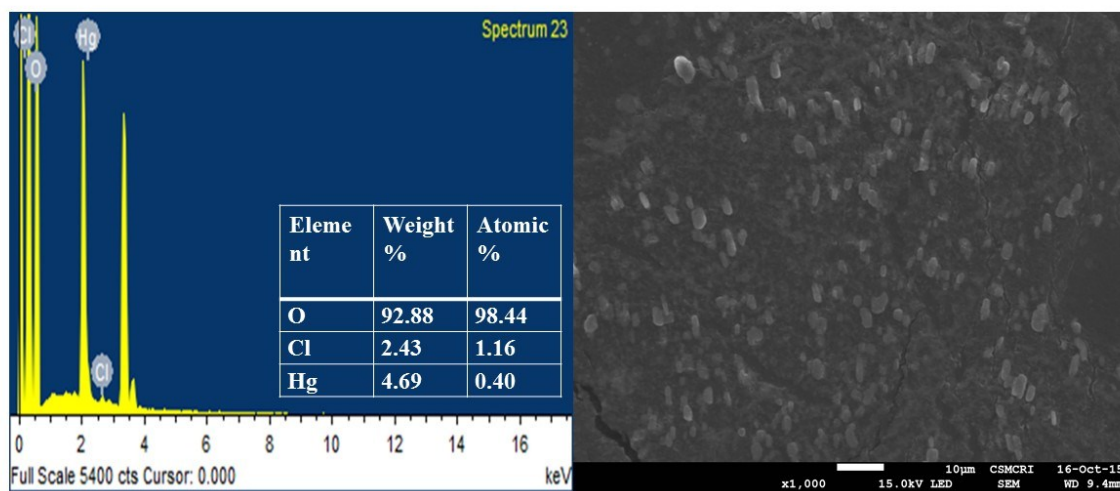

Supplement: c6ra22753h1.pdf [file c6ra22753h1.pdf]
